# Supplementary material for: Loss of Adipocyte STAT5 Confers Increased Depot-Specific Adiposity in Male and Female Mice That Is Not Associated With Altered Adipose Tissue Lipolysis
Source: PubMed Central journal article supplement (PMC9022209; doi:10.3389/fendo.2022.812802), 2022-04-07
Supplement: DataSheet_1.pdf [file DataSheet_1.pdf]

## Supplementary Material

### 1 Supplementary Figures

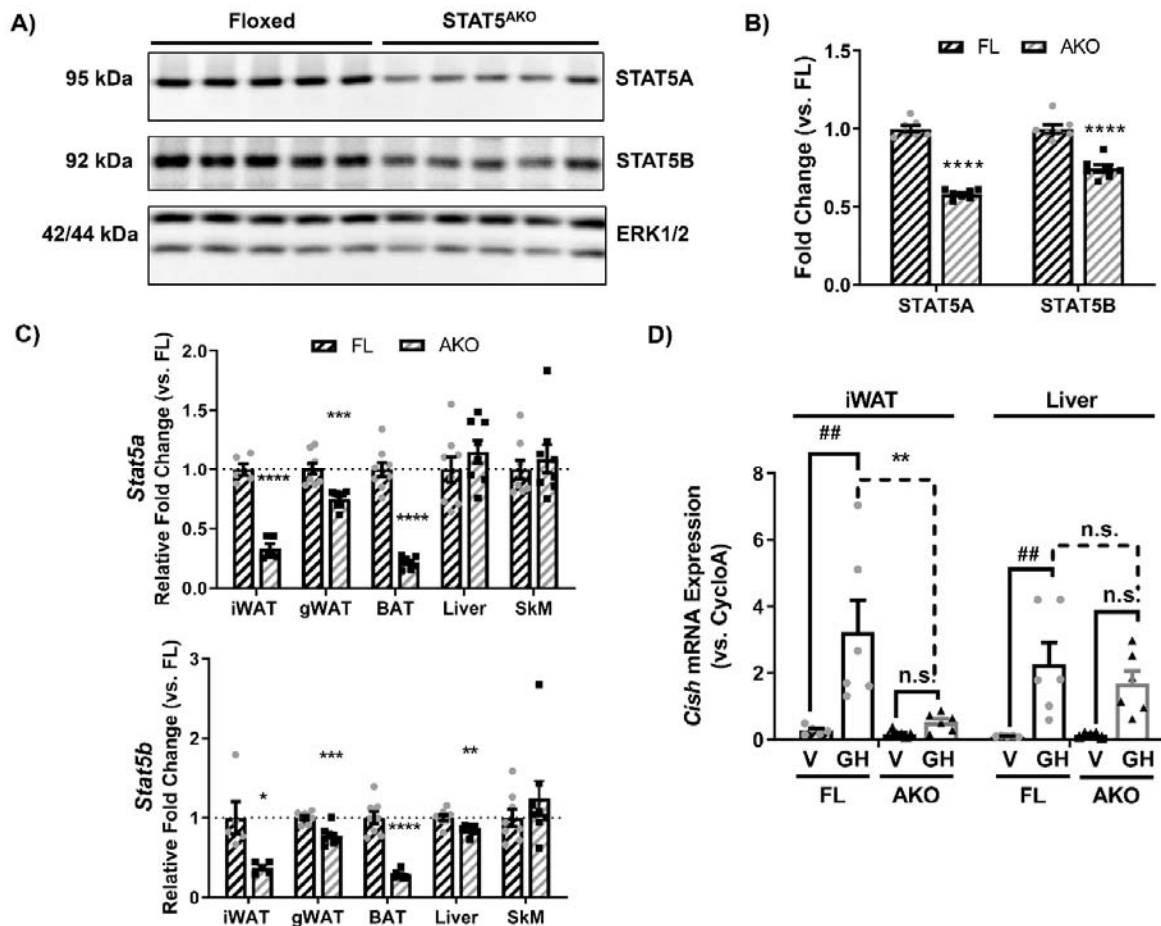

**Figure S1. Expression of STAT5A and 5B is knocked down in adipose tissue and adipocytes of STAT5<sup>AKO</sup> male mice. Related to Figure 1.** Male STAT5<sup>AKO</sup> (AKO) mice and their floxed (FL) littermate controls were euthanized at 2 – 3 months of age and tissues were immediately collected for protein or gene expression analyses. A) Immunoblot of proteins resolved from iWAT samples (n = 7 per genotype; 5 representative samples shown for each genotype). B) Quantification of band intensities from A (n = 7 per group). Band intensities were normalized to the loading control, ERK1/2, and are presented as fold change relative to FL mice. C) *Stat5a* (top) and *Stat5b* (bottom) gene expression measured by RT-qPCR for the indicated tissues (n = 5 – 8 mice per group). D) Mice were injected with 1.5mg/kg mGH or vehicle (V; 0.9% Saline-NaOH) for 30 minutes prior to euthanasia and tissue collection. *Cish* gene expression, measured by RT-qPCR, is shown (n = 5 – 6 mice per group). Significance was determined by *t*-test for AKO versus FL comparisons and is denoted as \* p < 0.05, \*\* p < 0.01, \*\*\* p < 0.001, \*\*\*\* p < 0.0001, n.s., not significant. For D, a 2-way ANOVA was used to assess treatment/genotype and tissue variables with Tukey's post-hoc multiple comparisons test to compare all treatment/genotype groups for each tissue; ## denotes p < 0.01 for GH versus V comparisons.

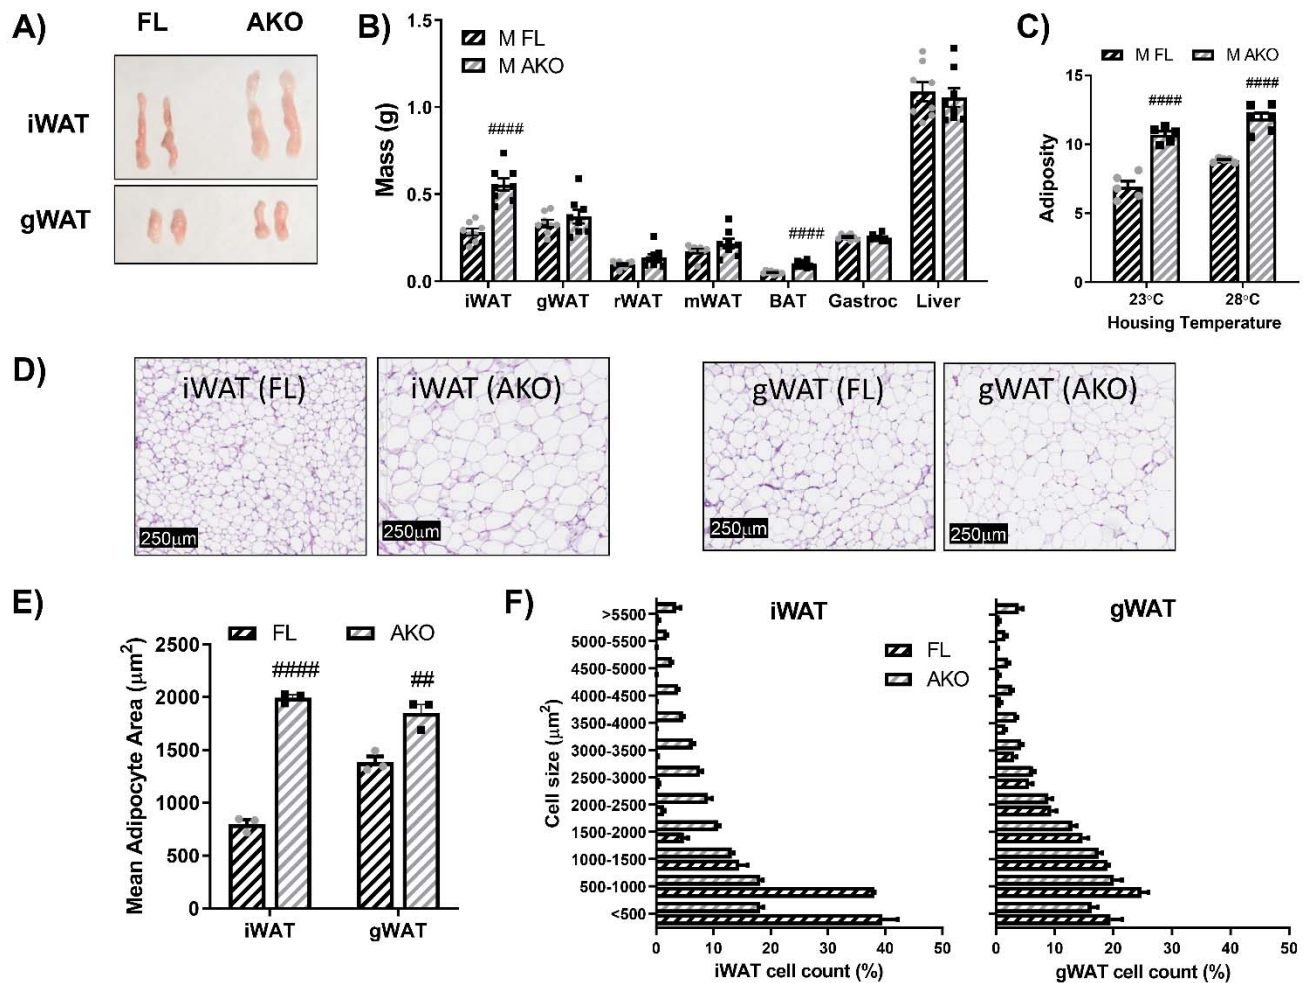

**Figure S2. Male STAT5<sup>AKO</sup> mice have increased subcutaneous adiposity when fed chow diet. Related to Figure 2.** Male STAT5<sup>AKO</sup> (AKO) and floxed (FL) littermate control mice were weaned onto regular chow diet (13% kcal from fat). A) Representative images of inguinal and gonadal white adipose tissue depots (iWAT and gWAT) from five-month-old mice. B) Weights of white adipose tissue depots (iWAT, gWAT, retroperitoneal - rWAT, mesenteric - mWAT), brown adipose tissue (BAT), gastrocnemius skeletal muscle (Gastroc), and liver from 10-week-old mice (n = 11-13). C) Mice (n = 5-6 per group) were housed at different temperatures beginning at weaning (3 weeks of age). Body composition was measured at 9 weeks of age, adiposity was calculated as fat mass divided by total body weight for each animal. D) Representative images of H&E-stained inguinal and gonadal white adipose tissue depots (iWAT and gWAT) from five-month-old mice. Quantification of total mean adipocyte area (E) and fat cell size distribution (F) from H&E-stained images shown in D (n = 3 mice per genotype). Significance was determined by *t*-test and is denoted as ## p < 0.01 or #### p < 0.0001 for AKO versus FL comparisons.

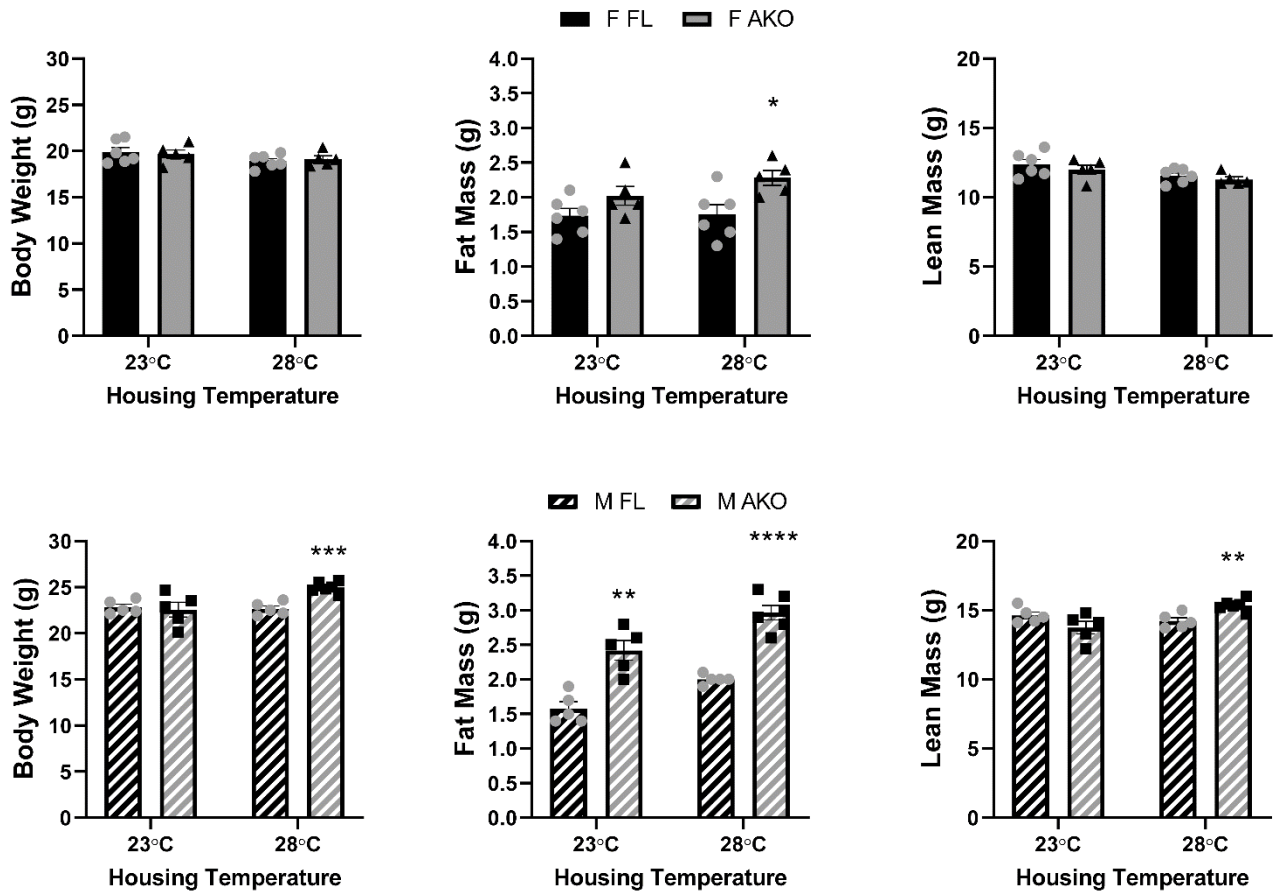

**Figure S3. Body composition data for mice at ambient and thermoneutral housing temperatures. Related to Figures 2 and S2.** Female (top) and male (bottom) mice (n = 5 – 6 per group) were housed at the indicated temperatures beginning at weaning (3 weeks of age) and fed chow diet (13% kcal from fat). Body weight and body composition (fat mass and lean mass measured by NMR) were assessed at 9 weeks of age. Significance was determined using multiple *t*-tests with the Holm-Sidak method, and the adjusted *p*-value is denoted as \* *p* < 0.05, \*\* *p* < 0.01, \*\*\* *p* < 0.001, or \*\*\*\* *p* < 0.0001 for AKO versus FL comparisons.

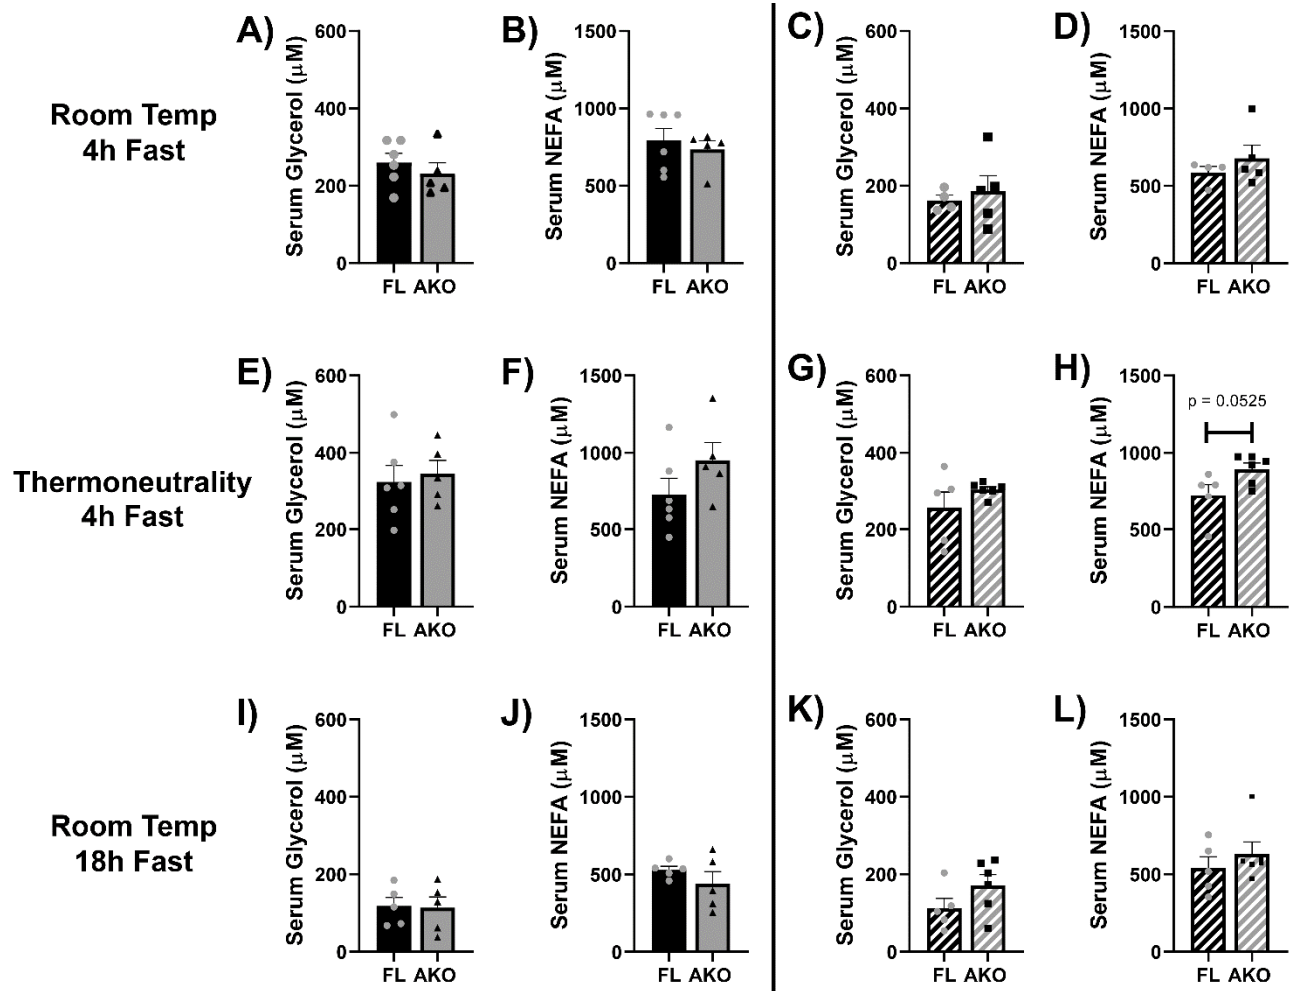

**Figure S4. Serum glycerol and non-esterified fatty acids (NEFA) measurements from mice that were housed at room temperature (23°C) or thermoneutrality (28°C) and fasted for 4h or 18h. Related to Figure 5.** Chow-fed female (A, B, E, F, I, and J) and male (C, D, G, H, K, and L) STAT5<sup>AKO</sup> (AKO) and floxed (FL) littermate control mice were housed at 23°C (room temp) or 28°C (thermoneutrality) upon weaning at 3 weeks of age (WOA). At 9 WOA, blood was collected via cardiac puncture following a 4h or 18h fast, and serum glycerol and NEFA levels were measured. Student's *t*-tests were used to test for significance between means ( $n = 4 - 6$  mice per genotype). None of the comparisons reached significance ( $p < 0.05$ ).

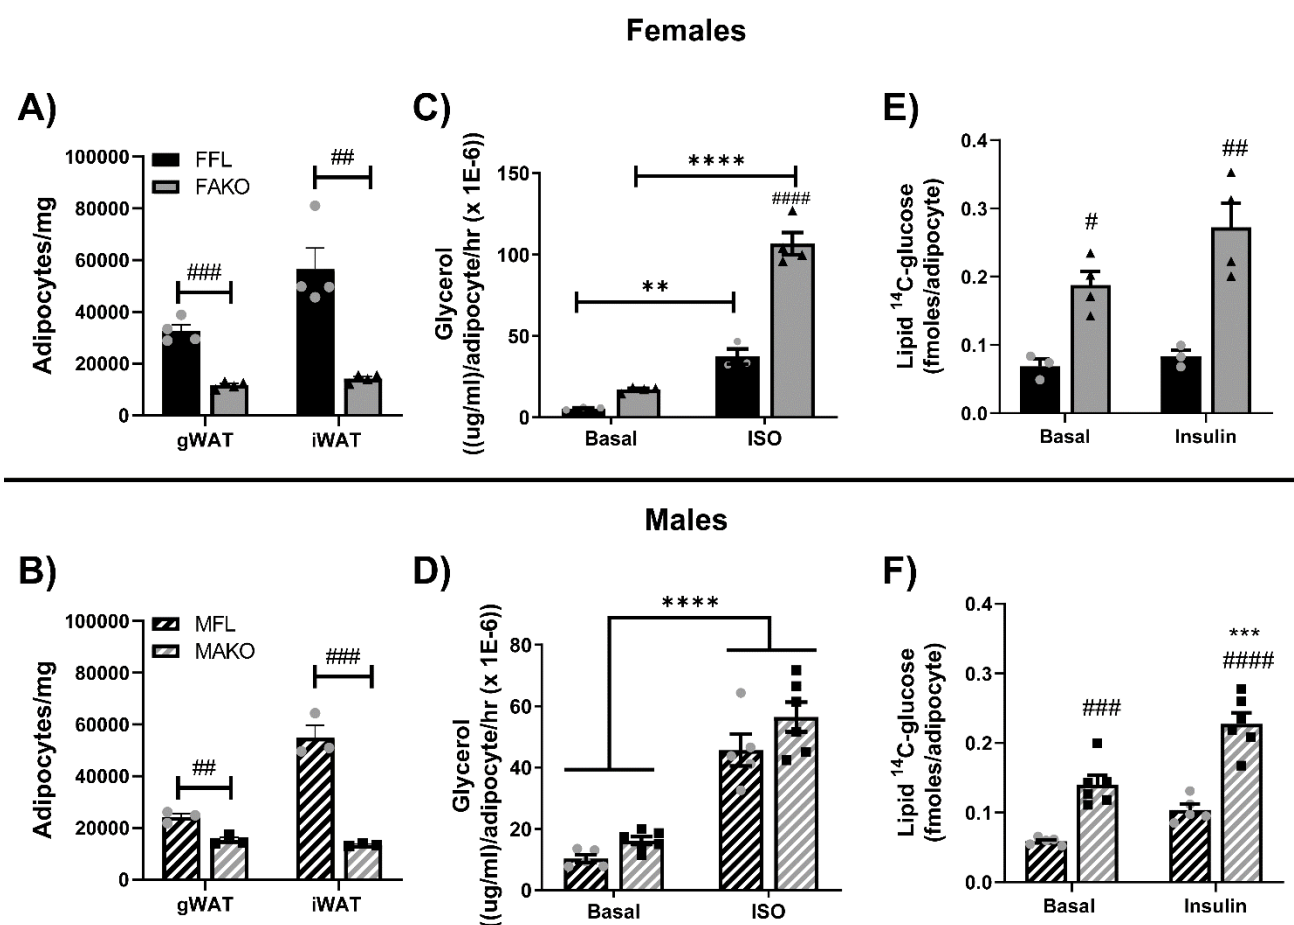

**Figure S5. Normalization of *ex vivo* assay data by adipocyte number/explant. Related to Figure 5.** *Ex vivo* lipolysis (C and D) and *de novo* lipogenesis (E and F) assays were performed using gWAT and iWAT explants, respectively, from chow-fed 5-month-old female (top) and male (bottom) STAT5<sup>AKO</sup> (AKO) and floxed (FL) littermate mice following a 4h fast. A and B) Using approximate adipocytes diameters, which were calculated from the cross-sectional area data used to generate Figures 2 and S2 D-FG, an estimated number of adipocytes per mg tissue was calculated for each AT depot as described in Section 3.3 of the Results. C and D) Glycerol release from gWAT explants (~20mg) into media following a 2 h-incubation period was measured under both basal and isoproterenol (ISO)-stimulated (10 $\mu$ M) conditions. E and F) Incorporation of <sup>14</sup>C-glucose into total triglycerides was measured by incubating iWAT explants (~50mg) with 4 $\mu$ Ci/ml of [<sup>14</sup>C]-U-glucose for 4.5 hours. The triglyceride (neutral lipid) fraction was purified and [<sup>14</sup>C] counts were measured by scintillation counting. All *ex vivo* assay data were normalized by an estimate of adipocyte number per explant. A and B) *t*-tests were used to test for significance between means (n = 3 - 4 mice per genotype). C and D) Two-way ANOVA with Tukey's post-hoc multiple comparison analysis was used to test for significance between genotypes and treatments (n = 3 - 6 mice per group). Significance is denoted as \*\* p < 0.01, \*\*\* p < 0.001, or \*\*\*\* p < 0.0001 for basal versus ISO or insulin comparisons and # p < 0.05, ## p < 0.01, ### p < 0.001, or #### p < 0.0001 for AKO versus FL comparisons.

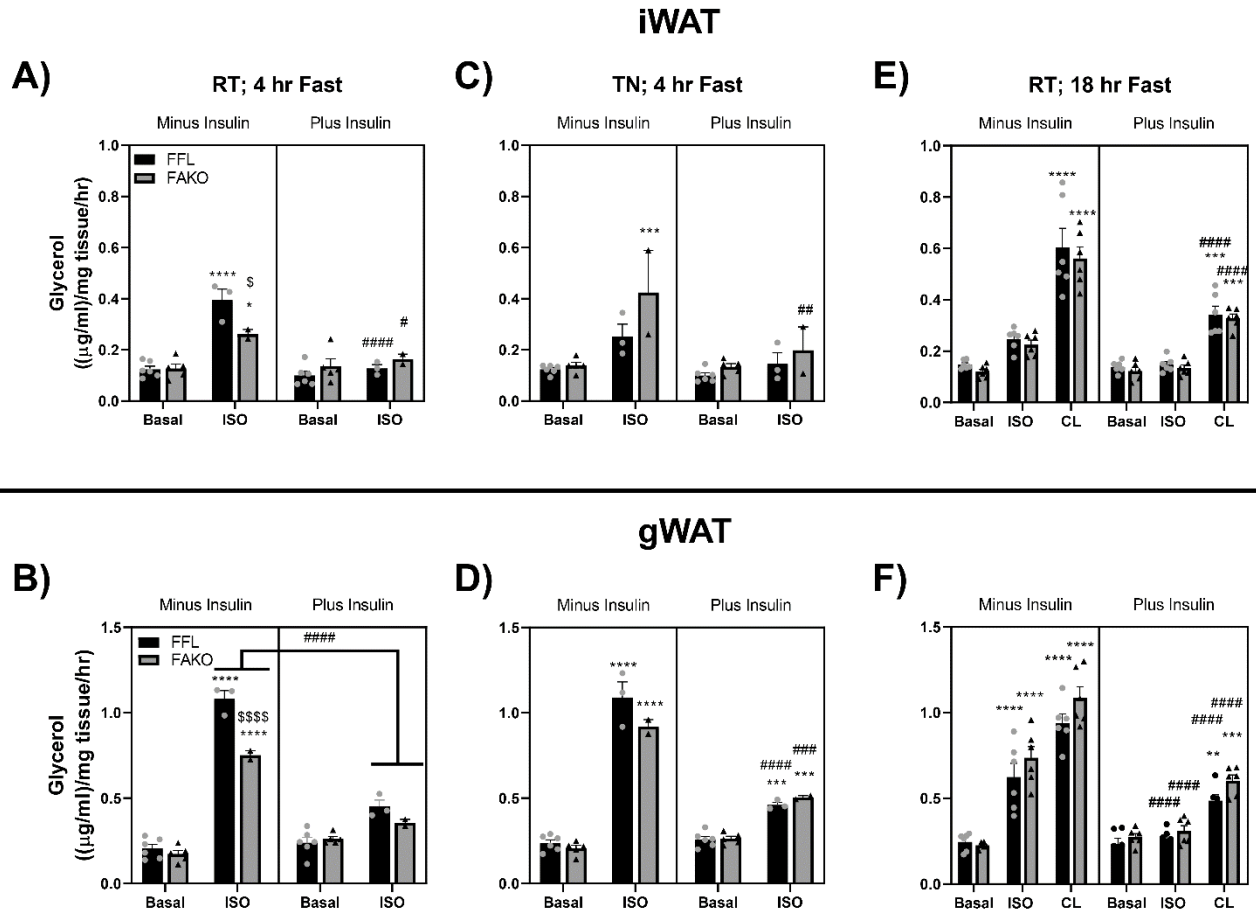

**Figure S6. Glycerol release during *ex vivo* lipolysis assays performed on AT explants from female mice. Related to Figure 5.** Chow-fed male STAT5<sup>AKO</sup> (AKO) and floxed (FL) littermate control mice were housed at 23°C (room temp; RT) or 28°C (thermoneutrality; TN) upon weaning at 3 weeks of age (WOA). At 9 WOA, mice were euthanized following a 4h or 18h fast, and *ex vivo* lipolysis assays were performed on iWAT and gWAT explants. Conditioned media were collected following incubation of the AT explants (~20mg) with water vehicle (basal), isoproterenol (ISO; 1µM for A – D and 200nM for E - F), or CL 316,243 (CL; 200nM for E and F) for 2h. The explants were rinsed in phosphate buffer saline and the transferred to fresh medium containing the vehicle, ISO, or CL treatments as before plus 10nM insulin, and then conditioned media were collected following a 1h incubation period. All glycerol levels were normalized by tissue weight and incubation time. A three-way, repeated measures ANOVA with Bonferroni's post-hoc multiple comparison analysis was used to test for significance between genotypes and treatments with insulin treatment as the repeated measure (n = 2 - 6 mice per group). Significance is denoted as \* p < 0.05, \*\* p < 0.01, \*\*\* p < 0.001, or \*\*\*\* p < 0.0001 for basal versus ISO or CL comparisons within the same genotype and insulin condition; # p < 0.05, ## p < 0.01, ### p < 0.001, or #### p < 0.0001 for minus versus plus insulin comparison of same genotype and treatment condition; and \$ p < 0.05 or \$\$\$\$ p < 0.0001 for AKO versus FL comparisons.

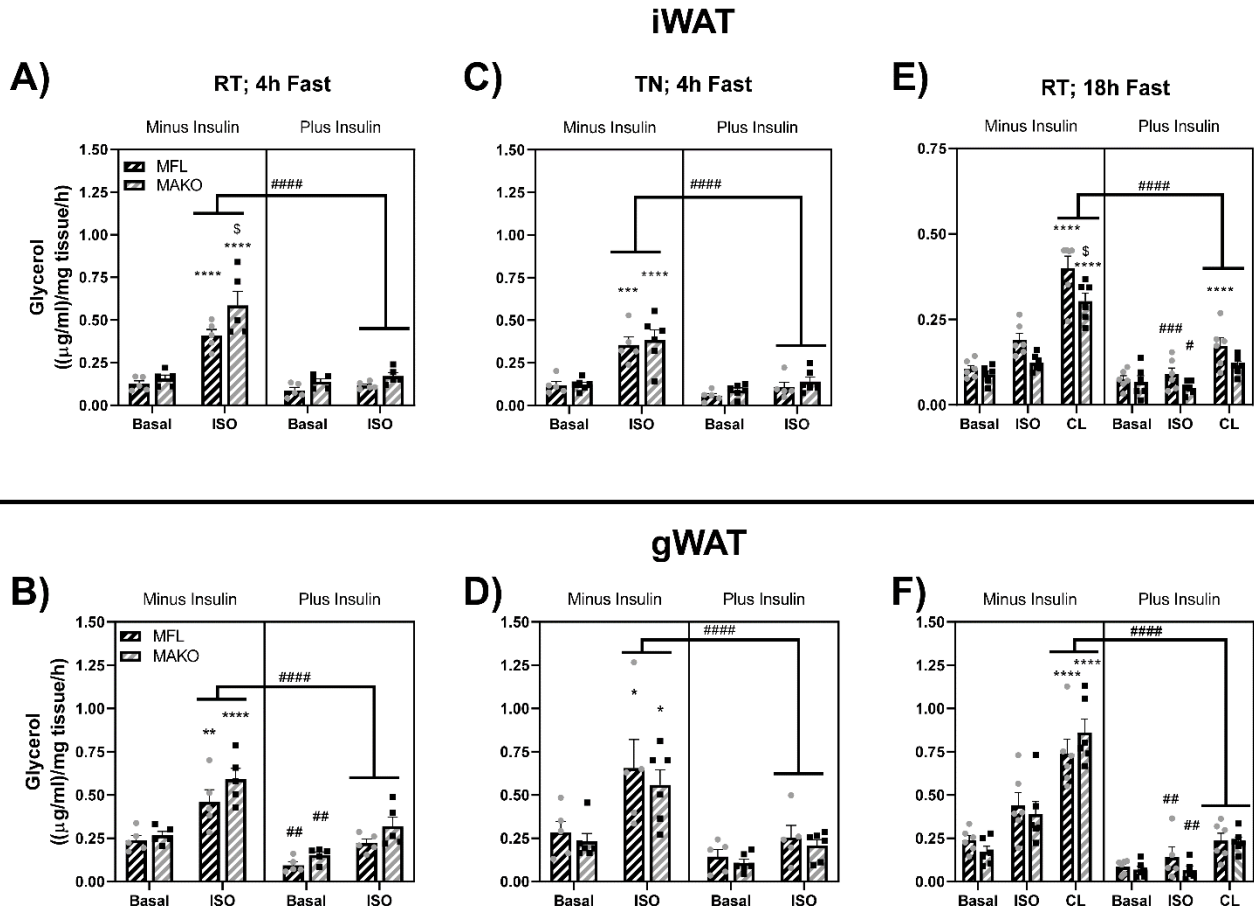

**Figure S7. Glycerol release during *ex vivo* lipolysis assays performed on AT explants from male mice. Related to Figure 5.** Chow-fed male STAT5<sup>AKO</sup> (AKO) and floxed (FL) littermate control mice were housed at 23°C (room temp; RT) or 28°C (thermoneutrality; TN) upon weaning at 3 weeks of age (WOA). At 9 WOA, mice were euthanized following a 4h or 18h fast, and *ex vivo* lipolysis assays were performed on iWAT and gWAT explants. Conditioned media were collected following incubation of the AT explants (~20mg) with water vehicle (basal), isoproterenol (ISO; 1µM for A – D and 200nM for E - F), or CL 316,243 (CL; 200nM for E and F) for 2h. The explants were rinsed in phosphate buffer saline and the transferred to fresh medium containing the vehicle, ISO, or CL treatments as before plus 10nM insulin, and then conditioned media were collected following a 1h incubation period. All glycerol levels were normalized by tissue weight and incubation time. A three-way, repeated measures ANOVA (A – E) or a mixed-effect model (F) with Bonferroni's post-hoc multiple comparison analysis was used to test for significance between genotypes and treatments with insulin treatment as the repeated measure (n = 5 - 6 mice per group). Significance is denoted as \* p < 0.05, \*\* p < 0.01, \*\*\* p < 0.001, or \*\*\*\* p < 0.0001 for basal versus ISO or CL comparisons within the same genotype and insulin condition; # p < 0.05, ## p < 0.01, ### p < 0.001, or #### p < 0.0001 for minus versus plus insulin comparison of same genotype and treatment condition; and \$ p < 0.05 for AKO versus FL comparisons.

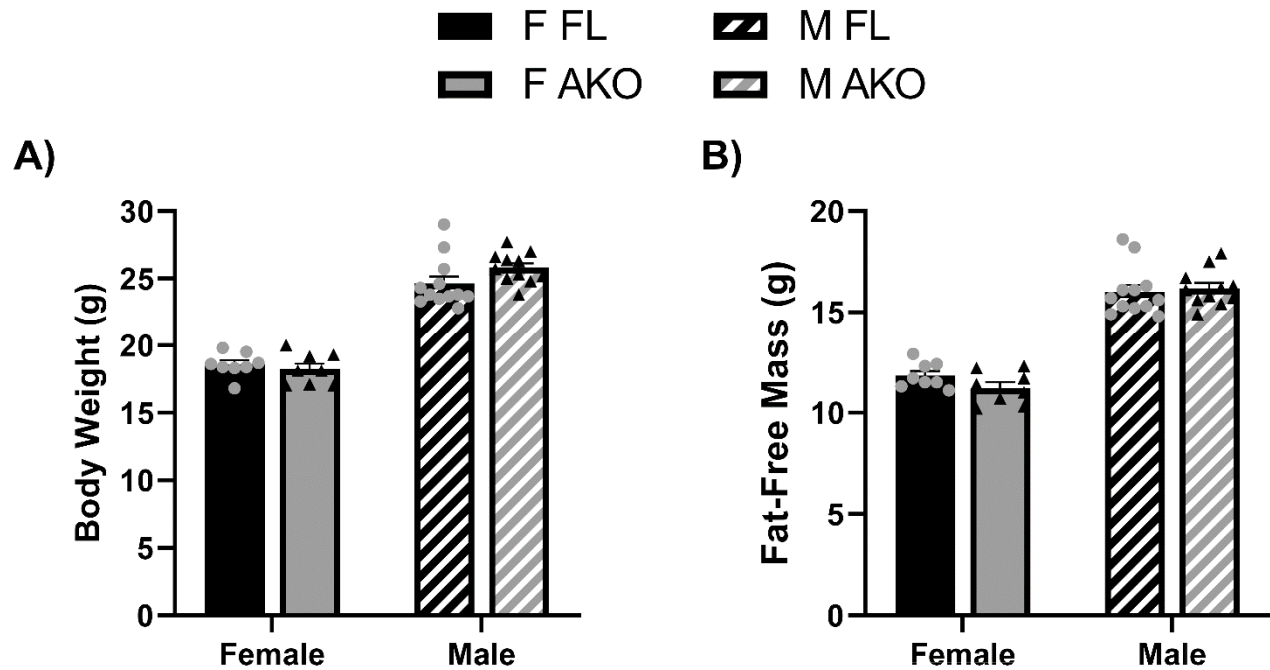

**Figure S8. Body weight and fat-free mass of female (F) and male (M) floxed control (FL) and STAT5<sup>AKO</sup> (AKO) mice measured in metabolic chambers. Related to Figure 6.** Body weight (A) and fat-free mass (B) were measured within 24 hours prior to placing the mice in the metabolic chambers. Significance was determined using multiple *t*-tests with the Holm-Sidak method, and none of the FL versus AKO comparisons were significantly different.



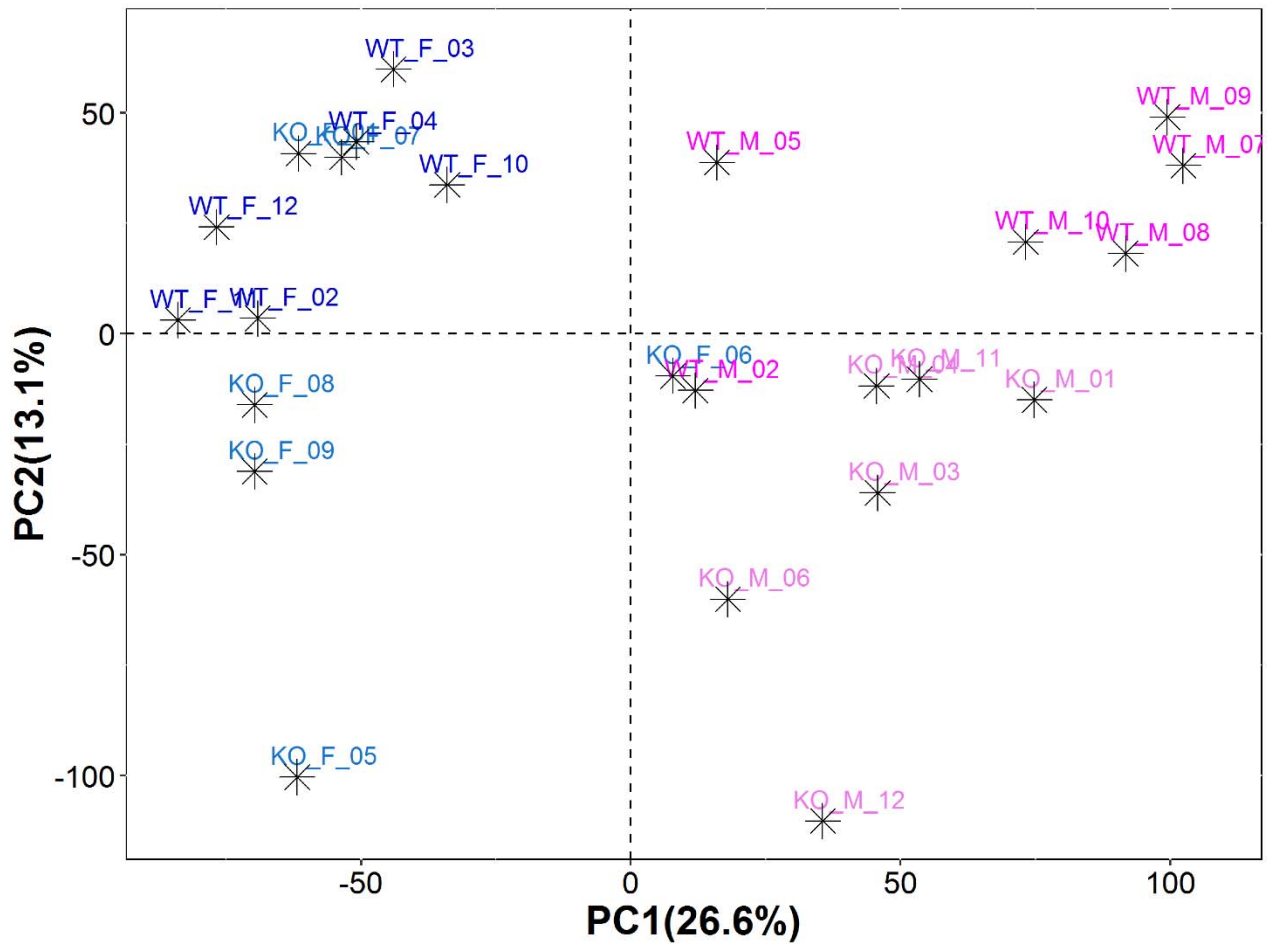

**Figure S9. Principal Components Analysis (PCA) scatterplot of RNA-sequencing gene expression data from male (M) and female (F) floxed (WT) and STAT5 adipocyte knockout (KO) mice. Related to Figure 7.** PCA was performed on voom-adjusted log<sub>2</sub> cpm data, after filtering out low expressed genes in limma. Each point represents data from an individual mouse. Floxed females - dark blue, KO females - light blue, floxed males – dark pink, and KO males – light pink.

## 2 Supplementary Tables

Table S1. Primer sequences for qPCR.

| <b>Gene</b>                 | <b>Primer 1 (5' – 3')</b> | <b>Primer 2 (5' – 3')</b> |
|-----------------------------|---------------------------|---------------------------|
| <i>Cgi-58/Abhd5</i>         | CCCACATCTACATCACACCTT     | GAGAGAACATCAGCGTCCATA     |
| <i>Adrb3</i>                | CCACCGCTCAACAGGTTT        | CCAGAAGTCCTGCAAAAACG      |
| <i>Cish</i>                 | GCTCCTTTCTCCTTCCATCC      | CCGCCCAATTTGCTCCA         |
| <i>Atgl/Pnpla2</i>          | GAGCTCATCCAGGCCAAT        | CTCATAAAGTGGCAAGTTGTCTG   |
| <i>Stat5a</i>               | **                        | **                        |
| <i>Stat5b</i>               | GTTCAACATCAGCAGCAACC      | TCAATACTTCCATCACGCCATC    |
| <i>Nono</i>                 | CATCATCAGCATCACCACCA      | TCTTCAGGTCAATAGTCAAGCC    |
| <i>Cyclophilin a (Ppia)</i> | TCTTCAGGTCAATAGTCAAGCC    | TGCAAACAGCTCGAAGGAGACGC   |

\*\* Qiagen RT<sup>2</sup> qPCR Primer Assay for Mouse Stat5a – Cat No. PPM04026C-200

**Table S2. Key resources table.**

| REAGENT or RESOURCE                                             | SOURCE                                                | IDENTIFIER                                                                         |
|-----------------------------------------------------------------|-------------------------------------------------------|------------------------------------------------------------------------------------|
| <b>Antibodies</b>                                               |                                                       |                                                                                    |
| STAT5A                                                          | Santa Cruz Biotechnology<br>Abcam                     | Cat#: sc-1081 (discontinued); RRID:<br>AB_632448<br>Cat#: ab32043; RRID: AB_778107 |
| STAT5B                                                          | R&D                                                   | Cat#: AF1584; RRID: AB_2197076                                                     |
| Adiponectin (ADPN)                                              | Thermo Fisher Scientific                              | Cat#: PA1-054; RRID: AB_325789                                                     |
| ATGL (PNPLA2)                                                   | Cell Signaling Technology                             | Cat#: 2439; RRID: AB_2167953                                                       |
| CGI-58 (ABHD5)                                                  | Santa Cruz Biotechnology                              | Cat#: sc-376931; RRID: AB_2868519                                                  |
| ADRB3                                                           | Santa Cruz Biotechnology                              | Cat#: sc-515763; RRID: AB_2868520                                                  |
| pERK1/2 (pTEpY)                                                 | Promega                                               | Cat#: V8031; RRID: AB_430866                                                       |
| ERK1/2                                                          | Santa Cruz Biotechnology<br>Cell Signaling Technology | Cat#: sc-93 (discontinued); RRID: 631453<br>Cat#: 4695; RRID: AB_390779            |
| Anti-rabbit HRP-conjugated                                      | Jackson ImmunoResearch                                | Cat#: 111-035-003                                                                  |
| Anti-mouse HRP-conjugated                                       | Jackson ImmunoResearch                                | Cat#: 115-035-071                                                                  |
| <b>Chemicals, Peptide, and Recombinant Proteins</b>             |                                                       |                                                                                    |
| Acrylamide, ProtoGel (30%)                                      | National Diagnostics                                  | EC-890                                                                             |
| Collagenase, Type I                                             | Worthington Biochemical                               | LS004196                                                                           |
| (-)-Isoproterenol (+)-bitartrate                                | Sigma-Aldrich                                         | I2760                                                                              |
| Murine growth hormone                                           | National Hormone and Peptide program                  | AFP904                                                                             |
| Insulin from bovine pancreas<br>(for lipogenesis assays)        | Sigma-Aldrich                                         | I5500                                                                              |
| Formalin                                                        | Thermo Fisher Scientific                              | 5725                                                                               |
| TRIzol Reagent                                                  | Thermo Fisher Scientific                              | 15596018                                                                           |
| <b>Critical Commercial Assays/Kits</b>                          |                                                       |                                                                                    |
| SuperSignal West Pico PLUS<br>Chemiluminescent Substrate        | Thermo Fisher Scientific                              | 34578                                                                              |
| Glycerol Assay Kit<br>Glycerol Standard                         | Sigma-Aldrich                                         | KG0100<br>G7793                                                                    |
| NEFA Assay Kit                                                  | BioVision                                             | K612-100                                                                           |
|                                                                 | Wako diagnostics                                      | 99934691, 99534791, 99134891,<br>99335191, 27676491                                |
| Triglyceride Assay Kit                                          | Sigma-Aldrich                                         | TR0100                                                                             |
| Mouse Insulin ELISA                                             | Crystal Chem                                          | 90080                                                                              |
| Mouse IGF-1 ELISA                                               | Crystal Chem                                          | 80574                                                                              |
| Mouse GH ELISA                                                  | Millipore Sigma                                       | EZRMGH-45K                                                                         |
| SYBR <sup>®</sup> Premix Ex Taq (Tli<br>RNase H Plus), Rox Plus | Takara Bio USA                                        | RR42LR                                                                             |
| Quant-Seq 3' mRNA-Seq<br>Library Prep Kit FWD for<br>Illumina   | Lexogen                                               | 015.2X96                                                                           |
| <b>Deposited Data</b>                                           |                                                       |                                                                                    |
| Raw and analyzed RNA-seq<br>data                                | This paper                                            | GEO: GSE113939                                                                     |
| <b>Experimental Models: Organisms/Strains</b>                   |                                                       |                                                                                    |
| B6.FVB-Tg(Adiopq-<br>cre)1Evdr/J                                | The Jackson Laboratory                                | 028020                                                                             |
| STAT5 <sup>fl/fl</sup>                                          | (Cui et al., 2004)                                    | N/A                                                                                |
| STAT5 <sup>AKO</sup>                                            | This paper                                            | N/A                                                                                |

| Oligonucleotides                              |                                                                                                                                                             |                                    |
|-----------------------------------------------|-------------------------------------------------------------------------------------------------------------------------------------------------------------|------------------------------------|
| Primers for qPCR                              | Table S1                                                                                                                                                    | N/A                                |
| Software and Algorithms                       |                                                                                                                                                             |                                    |
| Graph Pad Prism 6 & 8.4                       | GraphPad Software                                                                                                                                           | N/A                                |
| JMP v. 14                                     | SAS Institute Inc.                                                                                                                                          |                                    |
| Image Studio Lite Ver 5.2                     | LI-COR Biosciences                                                                                                                                          | N/A                                |
| NanoZoomer Digital Pathology; NDP.view 2.7.52 | Hamamatsu                                                                                                                                                   | N/A                                |
| QuantSeq pipeline V1.8.8 on Bluebee platform  | <a href="https://www.lexogen.com/store/quantseq-data-analysis-bluebee-platform/">https://www.lexogen.com/store/quantseq-data-analysis-bluebee-platform/</a> | N/A                                |
| Other                                         |                                                                                                                                                             |                                    |
| Chow Diet                                     | LabDiet®                                                                                                                                                    | 5001 (standard) and 5015 (breeder) |
| Low Fat Diet (LFD), no sucrose                | Research Diets                                                                                                                                              | D12450K                            |
| High Fat Diet (HFD)                           | Research Diets                                                                                                                                              | D12492                             |
| IACUC Protocol Numbers                        | n/a                                                                                                                                                         | P863, P977, P985                   |
| Glucometer                                    | Bayer                                                                                                                                                       | Breeze 2                           |
| Sarstedt Capillary blood collection tube      | Fisher Scientific                                                                                                                                           | NC9059691                          |
| Microplate spectrophotometer                  | Molecular Devices                                                                                                                                           | VersaMax                           |
| NMR Machine                                   | Bruker                                                                                                                                                      | Minispec LF110                     |
| 7900HT qPCR Machine                           | Applied Biosystems                                                                                                                                          | N/A                                |
| Metabolic Chambers                            | Sable Systems International                                                                                                                                 | Promethion                         |
| NextSeq 500 Sequencer                         | Illumina                                                                                                                                                    | N/A                                |

**Table S3. Differentially expressed genes in male and female STAT5<sup>AKO</sup> mice from RNA sequencing analysis.**

Table S3.xlsx

**Table S4. Differentially regulated KEGG pathways identified by gene-set enrichment analysis (GSEA).**

Table S4.xlsx
